# Supplementary material for: A repeating fast radio burst associated with a persistent radio source
Source: PubMed Central journal article supplement (PMC9242862; doi:10.1038/s41586-022-04755-5), 2022-06-08
Supplement: 41586_2022_4755_MOESM1_ESM.pdf [file 41586_2022_4755_MOESM1_ESM.pdf]

## Supplementary information

---

# A repeating fast radio burst associated with a persistent radio source

---

In the format provided by the  
authors and unedited

# Supplementary Information

Table 1: **Properties of the 79 FRB 20190520B bursts detected by FAST.**

| Burst ID <sup>a</sup> | Burst time <sup>b</sup><br>(MJD) | DM <sup>c</sup><br>( pc cm <sup>-3</sup> ) | Pulse width<br>(ms) | Scatter tail <sup>d</sup><br>(ms) | Fluence<br>(mJy ms) | Energy <sup>e</sup><br>( $\times 10^{37}$ erg) |
|-----------------------|----------------------------------|--------------------------------------------|---------------------|-----------------------------------|---------------------|------------------------------------------------|
| <b>P1</b>             | 58623.716958197                  | 1238.6(20) <sup>f</sup>                    | 8.7(8)              | -                                 | 75(3)               | 9.1(4)                                         |
| P2                    | 58623.716997034                  | 1238.6(20)                                 | 16.4(6)             | -                                 | 30(2)               | 3.6(2)                                         |
| P3                    | 58623.717075743                  | 1238.6(20)                                 | 7.1(8)              | -                                 | 53(3)               | 6.4(4)                                         |
| P4                    | 58623.717421629                  | 1238.6(20)                                 | 7.3(10)             | -                                 | 51(4)               | 6.2(5)                                         |
| <b>P5</b>             | 58963.766862939                  | 1209.1(10)                                 | 10.4(2)             | -                                 | 65(6)               | 8.0(8)                                         |
| P6                    | 58963.790991383                  | 1209.1(10)                                 | 10.2(17)            | 13.1(23)                          | 52(5)               | 6.4(6)                                         |
| P7                    | 58991.684351079                  | 1214.2(5)                                  | 20.3(4)             | -                                 | 107(18)             | 13.0(22)                                       |
| P8                    | 58991.686137870                  | 1214.2(5)                                  | 22.8(83)            | -                                 | 100(10)             | 12.2(12)                                       |
| P9                    | 58991.686875951                  | 1214.2(5)                                  | 9.2(2)              | -                                 | 81(12)              | 9.8(15)                                        |
| P10                   | 58991.704636888                  | 1214.2(5)                                  | 19.5(17)            | 3.6(8)                            | 108(12)             | 13.1(15)                                       |
| P11                   | 58991.704638485                  | 1214.2(5)                                  | 9.7(7)              | -                                 | 42(0)               | 5.2(0)                                         |
| P12                   | 58991.717697335                  | 1214.2(5)                                  | 11.9(11)            | 10.3(12)                          | 122(21)             | 14.9(25)                                       |
| P13                   | 58991.717878516                  | 1214.2(5)                                  | 14.3(40)            | 5.1(25)                           | 58(10)              | 7.1(12)                                        |
| P14                   | 58991.718217265                  | 1214.2(5)                                  | 11.8(15)            | -                                 | 63(6)               | 7.7(8)                                         |
| P15                   | 58991.718217670                  | 1214.2(5)                                  | 17.5(3)             | -                                 | 39(4)               | 4.8(5)                                         |
| <b>P16</b>            | 58991.718218082                  | 1214.2(5)                                  | 20.2(22)            | 12.6(19)                          | 153(28)             | 18.6(34)                                       |
| P17                   | 58991.735450006                  | 1214.2(5)                                  | 30.2(5)             | -                                 | 138(21)             | 16.8(26)                                       |
| P18                   | 58991.750640038                  | 1214.2(5)                                  | 17.7(13)            | -                                 | 60(9)               | 7.4(11)                                        |
| P19                   | 58991.750640790                  | 1214.2(5)                                  | 20.2(5)             | -                                 | 81(14)              | 9.9(17)                                        |
| P20                   | 59060.484475154                  | 1209.1(5)                                  | 13.5(13)            | 11.3(14)                          | 241(12)             | 29.3(15)                                       |
| P21                   | 59060.507858658                  | 1209.1(5)                                  | 7.3(9)              | 9.3(12)                           | 170(8)              | 20.7(10)                                       |
| <b>P22</b>            | 59060.525960600                  | 1209.1(5)                                  | 17.3(24)            | 7.6(16)                           | 167(14)             | 20.3(17)                                       |
| P23                   | 59061.512755579                  | 1209.1(6)                                  | 8.5(1)              | -                                 | 48(6)               | 5.9(7)                                         |
| <b>P24</b>            | 59061.512755780                  | 1209.1(6)                                  | 10.0(23)            | 4.7(17)                           | 129(16)             | 15.7(20)                                       |
| P25                   | 59061.516277966                  | 1209.1(6)                                  | 7.1(6)              | -                                 | 29(2)               | 3.6(3)                                         |
| P26                   | 59061.516278904                  | 1209.1(6)                                  | 7.5(4)              | -                                 | 49(5)               | 6.0(7)                                         |
| P27                   | 59061.516279436                  | 1209.1(6)                                  | 11.4(8)             | -                                 | 49(4)               | 6.0(5)                                         |
| P28                   | 59061.524341261                  | 1209.1(6)                                  | 10.7(8)             | 10.4(9)                           | 122(16)             | 14.8(19)                                       |
| P29                   | 59061.535633328                  | 1209.1(6)                                  | 14.0(4)             | -                                 | 84(8)               | 10.2(10)                                       |
| P30                   | 59061.536568858                  | 1209.1(6)                                  | 21.9(17)            | -                                 | 72(9)               | 8.7(11)                                        |

Table 1: **Properties of the 79 FRB 20190520B bursts detected by FAST.**

| Burst ID <sup>a</sup> | Burst time <sup>b</sup><br>(MJD) | DM <sup>c</sup><br>( pc cm <sup>-3</sup> ) | Pulse width<br>(ms) | Scatter tail <sup>d</sup><br>(ms) | Fluence<br>(mJy ms) | Energy <sup>e</sup><br>( $\times 10^{37}$ erg) |
|-----------------------|----------------------------------|--------------------------------------------|---------------------|-----------------------------------|---------------------|------------------------------------------------|
| P31                   | 59061.536569628                  | 1209.1(6)                                  | 19.0(14)            | 14.0(13)                          | 122(41)             | 14.8(50)                                       |
| P32                   | 59061.537903820                  | 1209.1(6)                                  | 23.9(27)            | 4.9(13)                           | 65(8)               | 8.0(9)                                         |
| P33                   | 59061.539298603                  | 1209.1(6)                                  | 9.9(3)              | -                                 | 73(9)               | 8.9(11)                                        |
| P34                   | 59061.541828100                  | 1209.1(6)                                  | 19.8(20)            | 8.7(10)                           | 212(28)             | 25.8(34)                                       |
| P35                   | 59067.467544345                  | 1202.8(6)                                  | 15.2(76)            | -                                 | 67(8)               | 8.2(10)                                        |
| P36                   | 59067.486738799                  | 1202.8(6)                                  | 14.9(22)            | 17.8(29)                          | 131(14)             | 15.9(17)                                       |
| <b>P37</b>            | 59067.486739378                  | 1202.8(6)                                  | 33.1(7)             | -                                 | 146(18)             | 17.8(21)                                       |
| P38                   | 59067.502691880                  | 1202.8(6)                                  | 14.3(6)             | -                                 | 134(3)              | 16.3(3)                                        |
| P39                   | 59067.509899127                  | 1202.8(6)                                  | 12.2(18)            | 10.3(17)                          | 122(8)              | 14.8(9)                                        |
| P40                   | 59067.535246460                  | 1202.8(6)                                  | 7.6(2)              | -                                 | 74(9)               | 9.0(11)                                        |
| P41                   | 59069.495909561                  | 1190.2(11)                                 | 16.8(5)             | -                                 | 143(10)             | 17.4(12)                                       |
| <b>P42</b>            | 59069.501196109                  | 1190.2(11)                                 | 18.7(1)             | -                                 | 291(14)             | 35.4(17)                                       |
| P43                   | 59069.514994796                  | 1190.2(11)                                 | 12.2(15)            | 11.6(17)                          | 192(13)             | 23.4(15)                                       |
| P44                   | 59071.472522775                  | 1200.0(11)                                 | 5.2(3)              | -                                 | 79(1)               | 9.6(2)                                         |
| P45                   | 59071.472523007                  | 1200.0(11)                                 | 7.2(7)              | -                                 | 66(1)               | 8.1(2)                                         |
| <b>P46</b>            | 59071.491696655                  | 1200.0(11)                                 | 10.4(20)            | 4.9(15)                           | 184(4)              | 22.4(5)                                        |
| P47                   | 59073.496887082                  | 1197.0(7)                                  | 7.8(2)              | -                                 | 107(9)              | 13.1(11)                                       |
| <b>P48</b>            | 59073.515256071                  | 1197.0(7)                                  | 18.7(6)             | -                                 | 147(2)              | 17.9(2)                                        |
| P49                   | 59073.515256881                  | 1197.0(7)                                  | 11.1(7)             | -                                 | 57(4)               | 7.0(5)                                         |
| <b>P50</b>            | 59075.454353002                  | 1210.6(6)                                  | 24.9(1)             | -                                 | 313(19)             | 38.0(23)                                       |
| P51                   | 59075.454862469                  | 1210.6(6)                                  | 22.0(1)             | -                                 | 209(12)             | 25.5(15)                                       |
| P52                   | 59075.472181012                  | 1210.6(6)                                  | 14.0(5)             | -                                 | 114(6)              | 13.8(8)                                        |
| P53                   | 59075.484186304                  | 1210.6(6)                                  | 6.0(0)              | -                                 | 157(16)             | 19.1(20)                                       |
| P54                   | 59075.496463775                  | 1210.6(6)                                  | 16.7(4)             | -                                 | 83(8)               | 10.1(9)                                        |
| P55                   | 59077.448938437                  | 1209.9(4)                                  | 11.9(5)             | -                                 | 103(7)              | 12.5(8)                                        |
| P56                   | 59077.448939131                  | 1209.9(4)                                  | 14.4(7)             | -                                 | 107(5)              | 13.1(7)                                        |
| P57                   | 59077.449538432                  | 1209.9(4)                                  | 13.4(17)            | 10.6(16)                          | 199(10)             | 24.2(12)                                       |
| P58                   | 59077.449939184                  | 1209.9(4)                                  | 5.4(26)             | -                                 | 148(7)              | 18.0(8)                                        |
| P59                   | 59077.449939372                  | 1209.9(4)                                  | 9.6(29)             | -                                 | 121(11)             | 14.7(14)                                       |
| P60                   | 59077.460100338                  | 1209.9(4)                                  | 13.0(23)            | 13.5(28)                          | 132(1)              | 16.1(2)                                        |
| P61                   | 59077.460503968                  | 1209.9(4)                                  | 10.3(18)            | 10.6(21)                          | 94(5)               | 11.4(6)                                        |
| P62                   | 59077.466295203                  | 1209.9(4)                                  | 11.7(2)             | -                                 | 156(10)             | 19.0(12)                                       |

Table 1: **Properties of the 79 FRB 20190520B bursts detected by FAST.**

| Burst ID <sup>a</sup> | Burst time <sup>b</sup><br>(MJD) | DM <sup>c</sup><br>( pc cm <sup>-3</sup> ) | Pulse width<br>(ms) | Scatter tail <sup>d</sup><br>(ms) | Fluence<br>(mJy ms) | Energy <sup>e</sup><br>( $\times 10^{37}$ erg) |
|-----------------------|----------------------------------|--------------------------------------------|---------------------|-----------------------------------|---------------------|------------------------------------------------|
| P63                   | 59077.468715062                  | 1209.9(4)                                  | 18.4(35)            | 7.6(18)                           | 128(9)              | 15.6(11)                                       |
| P64                   | 59077.469903193                  | 1209.9(4)                                  | 11.2(10)            | 11.3(12)                          | 152(7)              | 18.5(9)                                        |
| P65                   | 59077.475047947                  | 1209.9(4)                                  | 11.0(17)            | 8.3(16)                           | 107(6)              | 13.0(8)                                        |
| P66                   | 59077.475330491                  | 1209.9(4)                                  | 14.0(8)             | 12.9(9)                           | 205(11)             | 24.9(14)                                       |
| P67                   | 59077.477447949                  | 1209.9(4)                                  | 2.0(1)              | -                                 | 70(2)               | 8.5(3)                                         |
| <b>P68</b>            | 59077.485451841                  | 1209.9(4)                                  | 14.3(1)             | -                                 | 332(7)              | 40.4(8)                                        |
| P69                   | 59077.485451957                  | 1209.9(4)                                  | 14.4(1)             | -                                 | 262(15)             | 31.8(19)                                       |
| P70                   | 59077.490027004                  | 1209.9(4)                                  | 8.4(4)              | -                                 | 132(2)              | 16.1(3)                                        |
| P71                   | 59077.491413589                  | 1209.9(4)                                  | 10.3(3)             | -                                 | 115(5)              | 14.0(6)                                        |
| P72                   | 59077.497806611                  | 1209.9(4)                                  | 15.3(22)            | 10.7(21)                          | 138(9)              | 16.8(11)                                       |
| P73                   | 59077.497957805                  | 1209.9(4)                                  | 13.6(4)             | -                                 | 89(5)               | 10.9(6)                                        |
| P74                   | 59077.498960966                  | 1209.9(4)                                  | 4.6(7)              | 11.8(15)                          | 94(6)               | 11.4(7)                                        |
| <b>P75</b>            | 59089.428163703                  | 1186.7(25)                                 | 11.2(2)             | -                                 | 112(3)              | 13.6(4)                                        |
| P76                   | 59089.436165435                  | 1186.7(25)                                 | 13.3(6)             | -                                 | 83(2)               | 10.1(3)                                        |
| <b>P77</b>            | 59111.370525959                  | 1183.3(17)                                 | 20.6(6)             | -                                 | 99(11)              | 12.0(14)                                       |
| P78                   | 59111.370526098                  | 1183.3(17)                                 | 6.7(1)              | -                                 | 106(8)              | 12.9(9)                                        |
| P79                   | 59111.370978062                  | 1183.3(17)                                 | 14.6(5)             | -                                 | 98(9)               | 11.9(11)                                       |

<sup>a</sup> The burst IDs are from 1 to 79. P1 to P4 were detected in the drift scan mode. P4 to P79 were detected in the tracking mode.

<sup>b</sup> Arrival time of burst at the solar system barycenter in barycentric dynamical time (TDB). They are corrected to the frequency of 1.5 GHz in the International Celestial Reference System (ICRS).

<sup>c</sup> All the bursts detected on the same day are assigned the best fit DM value of the highest S/N burst from that day; the highest S/N burst ID is shown in bold for each observing epoch. Epochs are separated by single horizontal lines and the apparent DM variations may solely be the result of the variable spectra-temporal structure of the bursts.

<sup>d</sup> We only report burst scattering timescales with fractional uncertainties less than 50%. These scattering times are based on fitting a Gaussian pulse convolved with a one-sided exponential to the 1D burst profile, which was averaged over the entire burst bandwidth.

<sup>e</sup> Energy here refers to equivalent isotropic energy.

<sup>f</sup> Reported uncertainties correspond to the last consecutive digits; e.g., 1238.6(20) =  $1238.6 \pm 2.0$ .
